# Supplementary material
Source: ML conference proceedings conference paper supplement (https://openreview.net/forum?id=TWgoGdubPN)
Supplement: supplementary_material [file attachment]

# Feedback is All You Need: Real-World Reinforcement Learning with Approximate Physics-Based Models

Anonymous Author(s)

Affiliation

Address

email

**Abstract:** We focus on developing efficient and reliable policy optimization strategies for robot learning with real-world data. In recent years, policy gradient methods have emerged as a promising paradigm for training control policies in simulation. However, these approaches often remain too data inefficient or numerically unreliable to train on real robotic hardware. In this paper, we introduce a novel policy gradient estimator and corresponding optimization framework, which systematically exploits a (possibly highly simplified) differentiable dynamics model derived from physical first-principles. The key innovation of our approach is its use of a low-level feedback controller—designed based upon only the simplified model—within the class of learned policies. Theoretical analysis provides insight into how the presence of this feedback controller addresses core algorithmic challenges for policy gradient methods, while our hardware experiments with a small car and quadruped demonstrate that our approach can learn precise control strategies reliably and with only minutes of real-world data.

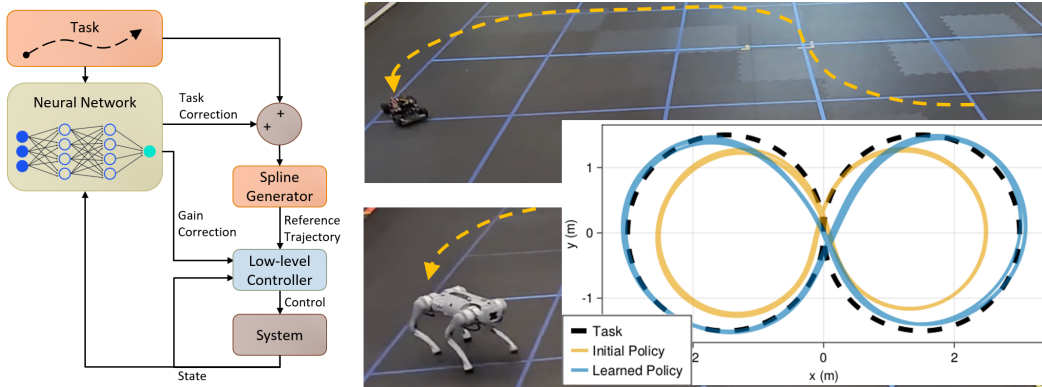

Figure 1: (Left) Schematic of the proposed policy structure, the crucial element of which is a low-level stabilizing controller which mitigates ill-conditioning in policy learning. (Middle) Still frames from a video (available in the supplemental material) depicting the approximate paths taken by a car and quadruped during test-time. (Overlaid) Top-down view of the car executing two laps of around a figure-8 before and after training.

## 1 Introduction

Reliable, high-performance robot decision making revolves around the robot’s ability to learn a control policy which effectively leverages complex real-world dynamics over long time-horizons. This presents a challenge, as constructing a highly accurate physics-based model for the system using first-principles is often impractical. In recent years, reinforcement learning methods built around policy gradient estimators have emerged as a promising general paradigm for learning an effective policy using data collected from the system. However, in current practice these approaches

are often too data-inefficient or unreliable to train with real hardware data, leading many approaches to train on high-fidelity simulation environments [1, 2, 3]. However, there inevitably exists a gap between simulated and physical reality, leaving room to improve policy performance in the real world. In this paper, we demonstrate how to systematically leverage a physics-based model to yield highly efficient and reliable policy optimization techniques capable of learning with real-world data.

Modern techniques for policy learning generally fall into two categories: model-free [4, 5, 6, 7] and model-based [8, 9, 10, 11, 12]. Model-free approaches learn a mapping from states to inputs directly from data. These approaches are fully general and can synthesize high-performing policies, but are extremely data-inefficient. Model-based approaches use the collected data to fit a predictive model to estimate how the system will behave at points not contained in the training set. While these approaches are more data-efficient, they inevitably introduce bias into policy optimization algorithms, which limits the precision and performance of the resulting control policy.

However, due to the unstable nature of many robotic systems, both of these paradigms suffer from a more fundamental challenge: minute changes to the control policy can greatly impact performance over long time-horizons. This “exploding gradients” phenomenon leads the variance of policy gradient algorithms to grow exponentially and renders the underlying policy learning problem ill-conditioned, making gradient-based methods slow to converge. Model-bias also compounds rapidly over time, limiting the effectiveness of otherwise-efficient model-based approaches.

We demonstrate how to systematically exploit an approximate physics-based model to overcome these challenges, despite its inevitable inaccuracies. Concretely, the contributions of this paper are:

- We introduce a novel framework which uses the approximate model to simultaneously design 1) a policy gradient estimator and 2) low-level tracking controllers which we then embed into the learned policy class. Using the model to construct the gradient estimator removes the need to learn about the real-world dynamics from scratch, while the low-level feedback controller prevents gradient estimation error from “exploding”.
- Theoretical analysis and illustrative examples demonstrate how we overcome exponential dependencies in the variance, conditioning, and model-bias of policy gradient estimators.
- We validate our theoretical findings with a variety of simulated and physical experiments, ultimately demonstrating our method’s data efficiency, run-time performance, and most importantly, ability to overcome substantial model mismatch.

## 2 Related Work

While a wide range of both model-based [4, 5, 6, 7] and model-free [8, 9, 10, 11, 12], reinforcement learning methods exist, the body of work most closely related to our own are works that seek to reduce model-bias for policy optimization algorithms. As prior works have noted [13, 14, 15], there are two sources of potential error when using a model. The first source of error can arise if the model is used to simulate or ‘hallucinate’ trajectories for the system which are then added to the data set [16, 17, 18, 19]. While this approach yields a larger training set, it also introduces bias as the trajectories generated by the model can rapidly diverge from the corresponding real world trajectory. To overcome this source of error, a number of works [13, 14, 15] have proposed policy gradient estimators which 1) collect real-world trajectories and 2) use the derivatives of a (possibly learned) model to propagate approximate gradient along these trajectories. Evaluating the gradient along real trajectories removes the first source of error. However, inaccuracies in the derivatives of the model lead to a second source of error and, as we demonstrate in Section 5, these errors can grow exponentially over long time horizons. We demonstrate how low-level feedback control can overcome this second source of error, while reducing variance and improving conditioning. Altogether, this enables us to use even highly inaccurate physics-based models to accelerate learning.

## 3 Problem Formulation

Our primary goal is to derive data-efficient, reliable learning algorithms capable of controlling real-world robotic systems, such as the scale car or quadrupedal robot depicted in Fig. 1.

72 **First-Principles Dynamics Models:** We assume access to a simplified, physics-based model of the  
 73 environment dynamics of the form:

$$x_{t+1} = \hat{F}(x_t, u_t), \quad (1)$$

74 where  $x_t \in \mathcal{X} \subset \mathbb{R}^n$  is the *state*,  $u_t \in \mathcal{U} \subset \mathbb{R}^m$  is the *input* and the (potentially nonlinear)  
 75 map  $\hat{F}: \mathcal{X} \times \mathcal{U} \rightarrow \mathcal{X}$  determines how state evolves over discrete time steps  $t \in \mathbb{N}$ . To make the  
 76 modelling process and down-stream controller synthesis tractable, such models are necessarily built  
 77 on simplifying assumptions. For example, the model we use to control the RC in Figure 1 neglects  
 78 physical quantities such as the current velocity of the wheels. Nonetheless, such models capture the  
 79 basic structure of the system, and are highly useful for designing effective control architectures.

80 **Reinforcement Learning on the Real-World System:** Although many reinforcement learning  
 81 frameworks model the environment as a stochastic process, to aid in our analysis, we will assume  
 82 that the real-world dynamics evolve deterministically, according to (potentially nonlinear) relation:

$$x_{t+1} = F(x_t, u_t). \quad (2)$$

83 To control the real-world system we will optimize over a controller architecture of the form  $u_t =$   
 84  $\pi_t^\theta(x_t)$  where  $\pi^\theta = \{\pi_t^\theta\}_{t=0}^{T-1}$  represent the overall policy,  $T < \infty$  is the finite horizon for the task  
 85 we wish to solve,  $\theta \in \Theta \subseteq \mathbb{R}^p$  is the policy parameter, and each map  $\pi_t^\theta: \mathcal{X} \rightarrow \mathcal{U}$  is assumed to be  
 86 differentiable in both  $x$  and  $\theta$ . Thus equipped, we pose the following policy optimization problem:

$$\max_{\theta \in \Theta} \mathcal{J}(\theta) := \mathbb{E}_{x_0 \sim D}[J_T(\theta; x_0)] \quad \text{where} \quad J_T(\theta; x_0) := \sum_{t=0}^T R(x_t), \quad (3)$$

87 where  $D$  is the probability density of the initial state  $x_0$  and  $R$  is the (differentiable) reward.

## 88 4 Approximating the Policy Gradient with an Imprecise Dynamics Model

89 In this section we demonstrate how to calculate the policy gradient by differentiating the real-world  
 90 dynamics map  $F$  along trajectories generated by the current policy. We then introduce the estimator  
 91 used in this paper, which replaces the derivatives of  $F$  with the derivatives of the first-principles  
 92 model  $\hat{F}$ . We will initially focus on the gradient  $\nabla J_T(\theta; x_0)$  of the reward experienced when un-  
 93 rolling the policy from a single initial condition  $x_0 \in \mathcal{X}$ , and then discuss how to approximate the  
 94 total policy gradient  $\nabla \mathcal{J}(\theta)$  using a batch estimator. To ease notation, for each  $x_0 \in \mathcal{X}$  and  $\theta \in \Theta$   
 95 we capture the resulting real-world trajectory generated by  $\pi^\theta$  via the sequence of maps defined by:

$$\phi_{t+1}^\theta(x_0) = F(\phi_t^\theta(x_0), \pi_t^\theta(\phi_t^\theta(x_0))), \quad \phi_0^\theta(x_0) = x_0.$$

96 **Structure of the True Policy Gradient:** We first fix the initial condition  $x_0 \in \mathcal{D}$  and policy pa-  
 97 rameter  $\theta \in \Theta$ , and investigate the structure of the true policy gradient  $\nabla J_T(\theta; x_0)$ . We let  $\{x_t\}_{t=0}^T$   
 98 and  $\{u_t\}_{t=0}^{T-1}$  (with  $x_t = \phi_t^\theta(x_0)$  and  $u_t = \pi_t^\theta(x_t)$ ) denote the corresponding sequences of states  
 99 and inputs generated by the policy  $\pi^\theta$ . The policy gradient captures how changes to the controller  
 100 parameters will affect the resulting trajectory and the accumulation of future rewards. We use the  
 101 following shorthand to capture the *closed-loop sensitivity* of the state and input to changes in the  
 102 policy parameters:

$$\frac{\partial x_t}{\partial \theta} := \frac{\partial}{\partial \theta} \phi_t^\theta(x_0), \quad \frac{\partial u_t}{\partial \theta} := \frac{\partial}{\partial \theta} \pi_t^\theta(\phi_t^\theta(x_0)).$$

103 These terms depend on the derivatives of the dynamics, which we denote with:

$$A_t = \frac{\partial}{\partial x} F(x_t, u_t), \quad B_t = \frac{\partial}{\partial u} F(x_t, u_t), \quad K_t = \frac{\partial}{\partial x} \pi_t^\theta(x_t; x_0). \quad (4)$$

104 **Proposition 1.** *The policy gradient is given by the following expression:*

$$\nabla J_T(\theta; x_0) = \sum_{t=0}^T \nabla R(x_t) \cdot \frac{\partial x_t}{\partial \theta}, \quad \text{where} \quad (5)$$

$$\frac{\partial x_t}{\partial \theta} = \sum_{t'=0}^{t-1} \Phi_{t,t'} B_{t'} \frac{\partial \pi_{t'}^\theta}{\partial \theta}, \quad \Phi_{t,t'} := \prod_{s=t'+1}^{t-1} A_s^{cl}, \quad \text{and} \quad A_t^{cl} = A_t + B_t K_t.$$

---

**Algorithm 1** “Policy Learning with Approximate Physical Models?”

---

```

1: Initialize Time horizon  $T \in \mathbb{N}$ , number of samples per update  $N \in \mathbb{N}$ , number of iterations
    $K \in \mathbb{N}$ , step sizes  $\{\alpha_k\}_{k=0}^{N-1}$  and initial policy parameters  $\theta_1 \in \Theta$ 
2: for iterations  $k = 1, 2, \dots, K$  do
3:   Sample  $N$  tasks  $\{(x_0^i)_{i=1}^N\} \sim \mathcal{D}^N$ 
4:   for For task  $i = 1, 2, \dots, N$  do
5:     Unroll  $x^i = \{\phi_t^{\theta_k}(x_0^i)\}_{t=0}^T$  on (2) with  $\pi_t^{\theta_k}$ 
6:     Estimate  $\hat{g}_T^N(\theta_k)$  using (8) and trajectories  $\{x^i\}_{i=1}^N$ 
7:     Update  $\theta_{k+1} = \theta_k + \alpha_k \hat{g}_T^N(\theta)$ 

```

---

For proof of the result see the supplementary material. The first expression in 5 calculates the gradient in terms of the sensitivities  $\frac{\partial x_t}{\partial \theta}$ , while the latter expressions demonstrate how to compute this term using the derivatives of the model and policy. In (5) the term  $\Phi_{t,t'} B_{t'}$  captures how a perturbation to the policy at time  $t'$  and state  $x_{t'}$  propagates through the closed-loop dynamics to affect the future state at time  $t > t'$ . As we investigate below, when the robotic system is unstable these terms can grow exponentially large over long time horizons, leading to the exploding gradients phenomenon and the core algorithmic challenges we seek to overcome.

**Approximating the Policy Gradient Using the Model:** We approximate the policy gradient  $\nabla_{\theta} J_T(\theta; x_0)$  using the approximate physics-based model  $\hat{F}$  in (1). Holding  $x_0 \in \mathcal{X}$ ,  $\theta \in \Theta$ , and the resulting real-world trajectory  $\{x_t\}_{t=0}^T$ ,  $\{u_t\}_{t=0}^{T-1}$  fixed as above, we denote the derivatives of the *model* along this trajectory as:

$$\hat{A}_t = \frac{\partial}{\partial x} \hat{F}(x_t, u_t), \quad \hat{B}_t = \frac{\partial}{\partial u} F(x_t, u_t). \quad (6)$$

We can then construct an estimate for  $\nabla J_T(\theta; x_0)$  of the form:

$$\nabla_{\theta} \widehat{J_T}(\theta; x_0) = \sum_{t=0}^T \nabla R_t(x_t) \cdot \widehat{\frac{\partial x_t}{\partial \theta}}, \quad \text{where} \quad (7)$$

$$\widehat{\frac{\partial x_t}{\partial \theta}} = \sum_{t'=0}^{t-1} \hat{\Phi}_{t,t'} \hat{B}_{t'} \frac{\partial \pi_{t'}^{\theta}}{\partial \theta}, \quad \hat{\Phi}_{t,t'} := \prod_{s=t'+1}^{t-1} \hat{A}_s^{cl}, \quad \text{and } \hat{A}_t^{cl} = \hat{A}_t + \hat{B}_t K_t.$$

**Remark 1.** Note that this estimator can be evaluated by 1) recording the real-world trajectory which arises when policy  $\pi^{\theta}$  is applied starting from initial state  $x_0$ , and then 2) using the derivatives of the model  $\hat{F}$  to approximate the derivatives of the real-world system along that trajectory. Effectively, the only approximation here is of the form  $\Phi_{t,t'} B_{t'} \approx \hat{\Phi}_{t,t'} \hat{B}_{t'}$  when calculating the estimate of the system sensitivity  $\frac{\partial x_t}{\partial \theta} \approx \widehat{\frac{\partial x_t}{\partial \theta}}$ . In Sections 5 and 6, we study what causes this approximation to break down over long time horizons, and how properly-structured feedback controllers can help.

**Remark 2.** While the policy gradient approximation given by Eq. (7) will prove convenient for analysis, this formula requires numerous ‘forwards passes’ to propagate derivatives forwards in time along the trajectory. As we demonstrate in the supplementary material, in practice this approximation can be computed more efficiently using a single ‘backwards pass’ along the trajectory.

**Batch Estimation:** To approximate the gradient of the overall objective  $\nabla \mathcal{J}(\theta)$ , we draw  $N$  initial conditions  $\{x_0^i\}_{i=1}^N$  independently from the initial state distribution  $D$ , compute each approximate gradient  $\nabla J_T(\theta; x_0^i)$  as in (7), and finally compute:

$$\nabla \mathcal{J}(\theta) \approx \hat{g}_T^N(\theta; \{x_0^i\}_{i=1}^N) := \frac{1}{N} \sum_{i=1}^N \nabla \widehat{J_T}(\theta; x_0^i). \quad (8)$$

We use this estimator in our overall policy gradient algorithm, which is outlined in Algorithm 1.

## 5 Exploding Gradients: Key Challenges for Unstable Robotic Systems

We now dig deeper into the structure of the policy gradient and our model-based approximation. We repeatedly appeal to the following scalar linear system to illustrate how key challenges arise:

136 **Running Example:** Consider the case with true and modeled dynamics given respectively by:

$$x_{t+1} = F(x_t, u_t) = ax_t + bu_t \quad \text{and} \quad x_{t+1} = \hat{F}(x_t, u_t) = \hat{a}x_t + \hat{b}u_t, \quad (9)$$

137 where  $a, \hat{a}, b, \hat{b} > 0$  and  $x_t, u_t \in \mathbb{R}$ . Suppose we optimize over policies of the form  $u_t = \pi_t^\theta(x_t) =$   
 138  $\bar{u}_t$  where  $\theta = (\bar{u}_0, \bar{u}_1, \dots, \bar{u}_{T-1}) \in \mathbb{R}^T$  are the policy parameters. In this case, the policy param-  
 139 eters  $\{\bar{u}_t\}_{t=0}^{T-1}$  specify a sequence of open-loop control inputs applied to the system. Retaining the  
 140 conventions developed above, along every choice of  $\{\bar{u}_t\}_{t=0}^{T-1}$  and the resulting trajectory  $\{x_t\}_{t=0}^T$   
 141 we have  $A_t = a$ ,  $B_t = b$ ,  $\hat{A}_t = \hat{a}$ ,  $\hat{B}_t = \hat{b}$  and  $K_t = 0$ , and thus we have  $\Phi_{t,t'} = a^{t-t'-1}$  and  
 142  $\hat{\Phi}_{t,t'} = \hat{a}^{t-t'-1}$ . When  $a, \hat{a} > 1$ , the system (and model) are *passively unstable* [20, Chapter 5], and  
 143 small changes to the policy compound over time, as captured by and  $\|\Phi_{t,t'}\|$  and  $\|\hat{\Phi}_{t,t'}\|$  growing  
 144 exponentially with the difference  $t - t'$ , along with the formula for the gradients (5).

## 145 5.1 Exploding Model-Bias

146 Recall that the aforementioned estimator for  $\nabla J_T(\theta; x_0)$  only introduces error in the term  $\frac{\partial x_t}{\partial \theta} \approx \widehat{\frac{\partial x_t}{\partial \theta}}$   
 147 and in particular  $\Phi_{t,t'} B_{t'} \approx \hat{\Phi}_{t,t'} \hat{B}_{t'}$  along the resulting trajectory. We will seek to understand how  
 148 the point-wise errors in the derivatives of the model  $\Delta A_t^{cl} := \hat{A}_t^{cl} - A_t^{cl}$  and  $\Delta B_t := \hat{B}_t - B_t$   
 149 propagate over time. Towards this end we manipulate the following difference:

$$\begin{aligned} \hat{\Phi}_{t,t'} \hat{B}_{t'} - \Phi_{t,t'} B_{t'} &= \Phi_{t,t'} \hat{B}_{t'} + \Delta \Phi_{t,t'} \hat{B}_{t'} - \Phi_{t,t'} B_{t'} = \Phi_{t,t'} \Delta B_{t'} + \Delta \Phi_{t,t'} \hat{B}_{t'} \quad (10) \\ &= \Phi_{t,t'} \Delta B_{t'} + \left( \sum_{s=t'+1}^{t-1} \Phi_{t,s} \Delta A_s^{cl} \hat{\Phi}_{s-1,t'} \right) \hat{B}_{t'}, \end{aligned}$$

150 The last equality in (10) provides a clear picture of how inaccuracies in the derivatives of the model  
 151 are propagated over time. For example, when approximating  $\hat{\Phi}_{t,t'} \hat{B}_{t'} \approx \Phi_{t,t'} B_{t'}$  the error  $\Delta B_{t'}$  is  
 152 magnified by  $\Phi_{t,t'}$ , while the error  $\Delta A_{t'+1}^{cl}$  is magnified by  $\Phi_{t,t'+1}$ .

153 **Running Example:** Continuing with the scalar example, in this case we have  $\Delta B_t = \hat{b} - b$  and  
 154  $\Delta A_t^{cl} = \hat{a} - a$ . Moreover, using the preceding calculations, we have  $\hat{\Phi}_{t,t'} \hat{B}_{t'} - \Phi_{t,t'} B_{t'} = a^{t-t'}(\hat{b} -$   
 155  $b) + \sum_{s=t'+1}^{t-1} a^{t-t'-1} b(\hat{a} - a)$ . Thus, when  $a, \hat{a} > 1$  and the system is unstable, the errors in  
 156 derivatives of the model are magnified exponentially over long time horizons when computing the  
 157 sensitivity estimate  $\frac{\partial x_t}{\partial \theta} \approx \widehat{\frac{\partial x_t}{\partial \theta}}$  and ultimately the gradient estimate  $\nabla J_T(\theta; x_0) \approx \nabla \widehat{J_T}(\theta; x_0)$ .

## 158 5.2 Exploding Variance

159 We next illustrate how unstable dynamics can lead our batch estimator  $\hat{g}_T^N$  to explode over long time  
 160 horizons  $T$  unless a large number of samples  $N$  are used.

161 **Running Example:** Consider the case where  $r(x_t) = -\frac{1}{2}\|x_t\|_2^2$  and the initial state distribution is  
 162  $D$  uniform over the interval  $[-1, 1]$ . Consider the case where we apply  $\theta = (\bar{u}_1, \dots, \bar{u}_{T-1}) =$   
 163  $(0, \dots, 0)$  so that no control effort is applied. In this case, for every initial condition  $x_0$ , the  
 164 resulting state trajectory is given by  $x_t = a^t x_0$ , and thus our estimate for the gradient is  
 165  $\nabla J_T(\theta; x_0) = \sum_{t=0}^{T-1} (a^t x_0) \cdot \sum_{t'=0}^{t-1} a^{t-t'} b$ . Moreover, by inspection we see that the average  
 166 of the estimator is  $\mathbb{E}[\hat{g}_T^N(\theta; \{x_0\}_{i=1}^N)] = \mathbb{E}[\sum_{i=1}^N \hat{J}_T(\theta; x_0)] = 0$  and thus the variance of  
 167 the estimator is  $\frac{1}{N} \mathbb{E}[\|\hat{g}_T^N(\theta; \{x_0\}_{i=1}^N) - \mathbb{E}[\sum_{i=1}^N \hat{J}_T(\theta; x_0)]\|^2] = \frac{1}{N} \mathbb{E}[\|\hat{g}_T^N(\theta; \{x_0\}_{i=1}^N)\|^2] =$   
 168  $\frac{1}{N} \|\sum_{t=0}^{T-1} (a^t x_0) \cdot \sum_{t'=0}^{t-1} a^{t-t'} b\|^2$ , a quantity which grows exponentially with the horizon  $T > 0$ .

## 169 5.3 Ill-Conditioned Policy Optimization Problems:

170 For general non-convex optimization landscapes, such as the ones encountered in the general non-  
 171 linear policy optimization problems we consider here, convergence results for stochastic gradient  
 172 descent approximate stationary point, namely, a point  $\theta \in \Theta$  where  $\|\nabla \mathcal{J}(\theta)\| \leq \epsilon$  for some desired  
 173 tolerance  $\epsilon > 0$  [21]. Ill-conditioning depends on the Hessian of the objective  $\nabla^2 \mathcal{J}_T(\theta)$ . In partic-  
 174 ular, when the maximum eigenvalue of the Hessian is large we must take small step-sizes  $\{\alpha_k\}_{k=0}^K$

in Algorithm 1 to maintain algorithmic stability [21], slowing the convergence of the method. Here, we seek to understand how unstable dynamics lead to this pathology in our setting.

**Running Example:** Consider the case where the simple reward  $r(x_t) = -\frac{1}{2}\|x_t\|_2^2$  is applied to our simple scalar system. Using the formula for the Hessian above, for every initial condition  $x_0$  and choice of policy parameters  $\theta = (\bar{u}_1, \dots, \bar{u}_{T-1})$  we have  $\nabla^2 J_T(\theta; x_0) = \text{diag}(\Delta_1, \Delta_2, \dots, \Delta_{T-1})$ , where  $\text{diag}(\cdot)$  denotes a diagonal matrix with the given entries along the diagonal, and  $\Delta_t = \sum_{s=t+1}^T a^{s-t} b$ . Thus, we observe that in this case the largest eigenvalue of the Hessian grows exponentially with the time horizon in this case.

## 6 Embedding Low-Level Feedback into the Policy Class

We now demonstrate how we can overcome these pathologies by using the model to design stabilizing low-level feedback controllers which are then embedded into the policy class.

**Running Example:** Let us again consider the simple scalar system and model we have studied thusfar, but now suppose we use the model to design a proportional tracking controller of the form  $u_t = k(\bar{x}_t - x_t)$ , where  $\{\bar{x}_t\}_{t=0}^T$  represents a desired trajectory we wish to track and  $k > 0$  is the feedback gain. We then embed this controller into the overall policy class by choosing the parameters to be  $\theta = (\bar{x}_0, \bar{x}_1, \dots, \bar{x}_t)$  so that  $u_t = \pi_t^\theta(x_t) = k(\bar{x}_t - x_t)$ . Namely, here the parameters of the controller specify the desired trajectory the low-level controller is tasked with tracking. In this case, along each trajectory of the system we will now have  $A_t^{cl} = a - bk$ ,  $\hat{A}_t^{cl} = \hat{a} - \hat{b}k$ ,  $B_t = b$  and  $\hat{B}_t = b$ . If the gain  $k > 0$  is chosen such that  $|a - bk| < 1$  and  $|\hat{a} - \hat{b}k| < 1$ , then the transition matrices  $\hat{\Phi}_{t,t'} = (\hat{A}_t^{cl})^{t-t'-1}$  and  $\Phi_{t,t'} = (A_t^{cl})^{t-t'-1}$  will both decay exponentially with the difference  $t - t'$ . Thus, by optimizing through a low-level tracking controller designed with the model we have reduced the sensitivity of trajectories to changes in the controller parameters.

**Remark 3.** In practice, we may select a control architecture as in Fig. 1 where our parameters are those of a neural network which corrects a desired trajectory and low-level controller. The natural generalization of the damping behavior displayed by the proportional controller above is that the low-level controller is **incrementally stabilizing**, which means that for every initial condition  $x_0$  and  $\theta \in \Theta$  we will have  $\|\Phi_{t,t'}\| \leq M\alpha^{t-t'}$ . There are many systematic techniques for synthesizing incrementally stabilizing controllers using a model from the model-based control literature [20, 22].

We are now ready to state our main result, which demonstrates the benefits using the model to design the policy gradient estimator and embedded feedback controller:

**Theorem 1.** Assume that 1) the first and second partial derivatives of  $R_t$ ,  $\pi_t^\theta$ ,  $F$  and  $\hat{F}$  are bounded, 2) there exists a constant  $\Delta > 0$  such that for each  $x_0 \in \mathcal{X}$  and  $u \in \mathcal{U}$  the error in the model derivatives are bounded by  $\max\{\|\frac{\partial}{\partial x} F(x, u) - \frac{\partial}{\partial x} \hat{F}(x, u)\|, \|\frac{\partial}{\partial u} F(x, u) - \frac{\partial}{\partial u} \hat{F}(x, u)\|\} < \Delta$  and 3) the policy class  $\{\pi_t^\theta\}_{\theta \in \Theta}$  has been designed such that exists constants  $M, \alpha > 0$  such that for each  $x_0 \in \mathcal{X}$ ,  $\theta \in \Theta$ , and  $t > t'$  we have:  $\max\{\|\Phi_{t,t'}\|, \|\hat{\Phi}_{t,t'}\|\} < M\alpha^{t-t'}$ . Letting  $\bar{g}_T(\theta) = \mathbb{E}[\hat{g}_T^N(\theta; \{x_0^i\}_{i=1}^N)]$  denote the mean of our gradient estimator, there exists  $C, W, K > 0$  such that we may bound the bias and variance of our policy gradient estimator as follows:

$$\|\nabla J_T(\theta) - \bar{g}_T(\theta)\| \leq \begin{cases} CT^2 \alpha^T \Delta & \text{if } \alpha > 1 \\ CT^2 \Delta & \text{if } \alpha = 1 \\ CT \Delta & \text{if } \alpha < 1, \end{cases} \quad \mathbb{E}[\|\hat{g}_T^N(\theta) - \bar{g}_T(\theta)\|^2] \leq \begin{cases} \frac{WT^4 \alpha^{2T}}{N} & \text{if } \alpha > 1 \\ \frac{WT^4}{N} & \text{if } \alpha = 1 \\ \frac{WT^2}{N} & \text{if } \alpha < 1. \end{cases}$$

Moreover, the conditioning of the underlying policy optimization problem is characterized via:

$$\|\nabla^2 J_T(\theta)\|_2 \leq \begin{cases} KT^4 \alpha^{3T} & \text{if } \alpha > 1 \\ KT^4 & \text{if } \alpha = 1 \\ KT & \text{if } \alpha < 1. \end{cases}$$

Proof of the result can be found in the supplementary material. The result formalizes the intuition built with our example: when the system is passively unstable (and we can have  $\alpha > 1$ ), the core algorithmic challenges introduced above can arise. However, embedding a (incrementally stabilizing) low-level tracking controller into the policy class can overcome these pathologies ( $\alpha \leq 1$ ).



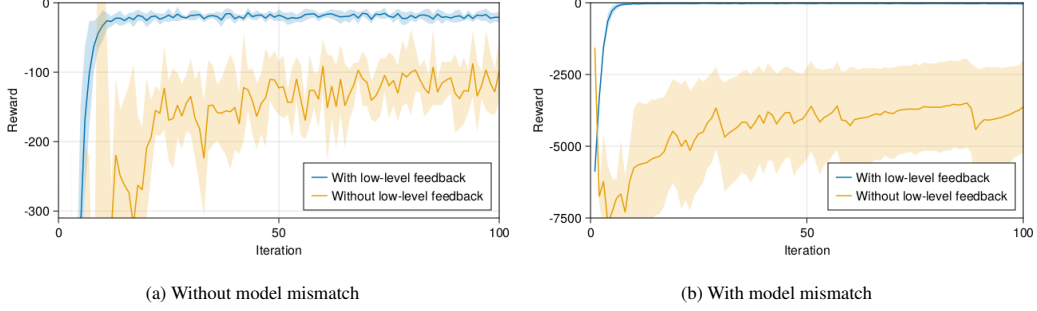

Figure 2: Training curves for the double pendulum experiment. Embedding low-level feedback results in better performance both with and without model mismatch.

## 7 Experimental Validation

We implement [Algorithm 1](#) in Julia [23] and interface with hardware in C++ using the Robot Operating System (ROS) [24] framework. Per [Section 6](#), for each example we consider below we construct our policy ([Fig. 1](#)) around a low-level controller designed using the model track reference trajectories. The neural network outputs 1) the parameters of a spline to define the reference trajectory and 2) feedback gains used by the low-level controller. The neural network is a  $64 \times 64$  multilayer perceptron with  $\tanh(\cdot)$  activations that takes in task, time, and/or state feedback information, and is constructed to provide offsets to nominal spine parameters and feedback gains.

**The Benefit of Low-Level Feedback:** We begin by comparing the policy class of [Fig. 1](#) against a policy class in which a neural network directly determines open-loop control inputs (as in [Section 5](#), omitting a low-level stabilizing controller). We use the double pendulum model from [25], and the task requires moving the end effector to a desired location, using a reward function based on Euclidean distance. **First experiment:** We provide the true dynamics to both approaches to observe the variance and conditioning, independent of model-mismatch. Each policy was trained using a batch size of 5, and training curves for the best learning rate for each approach are depicted in [Fig. 2a](#), which supports our main theoretical findings. **Second Experiment:** Next we feed the algorithm in [Algorithm 1](#) an approximate model that contains pendulum masses that are 50% of the actual values. As shown in [Fig. 2b](#), the unstable dynamics lead to significant model bias which limited the asymptotic performance of the naive controller without embedded feedback controller.

**NVIDIA JetRacer:** Next, we test our approach on an NVIDIA JetRacer 1/10<sup>th</sup> scale high-speed car using the following simplified dynamics model:

$$\begin{bmatrix} x_{t+1} \\ y_{t+1} \\ v_{t+1} \\ \phi_{t+1} \end{bmatrix} = \begin{bmatrix} x_t + v_t \cos(\phi_t) \Delta t \\ y_t + v_t \sin(\phi_t) \Delta t \\ v_t + a_t \Delta t \\ \phi_t + v_t \omega_t \Delta t \end{bmatrix}, \quad (11)$$

where  $\Delta t > 0$  is the discrete time-step,  $(x_t, y_t, \phi_t) \in SE(2)$  are the Cartesian coordinates and heading angle of the car,  $v_t > 0$  is the forward velocity of the car in its local frame, and  $(a_t, \omega_t) \in U = [0, 1] \times [-1, 1]$  are the control inputs where  $a_t$  is the throttle input percentage and  $\omega_t$  is the steering position of the wheels. We note that this model makes several important simplifications: (i) drag is significant on the actual car, but is missing from (11); (ii) proper scaling of the control inputs  $(a_t, \omega_t)$  has been omitted; (iii) the actual car has noticeable steering bias, and does not follow a straight line when  $\omega_t = 0$ ; and (iv) physical quantities such as the current speed of the tires or time-delays in the motor are ignored.

The task consists of tracking a figure-8 made up of two circles, 3 meters in diameter, with a nominal lap time of 5.5 s. We implement a backstepping-based tracking controller [20, Ch. 6] for low-level control. As shown in [Fig. 1](#) this controller alone does not ensure accurate tracking, due to inaccuracies in the model used to design it. We select a reward function that is a weighted sum of distance to the track and difference from nominal velocity. The policy was trained with 2.2 min. In

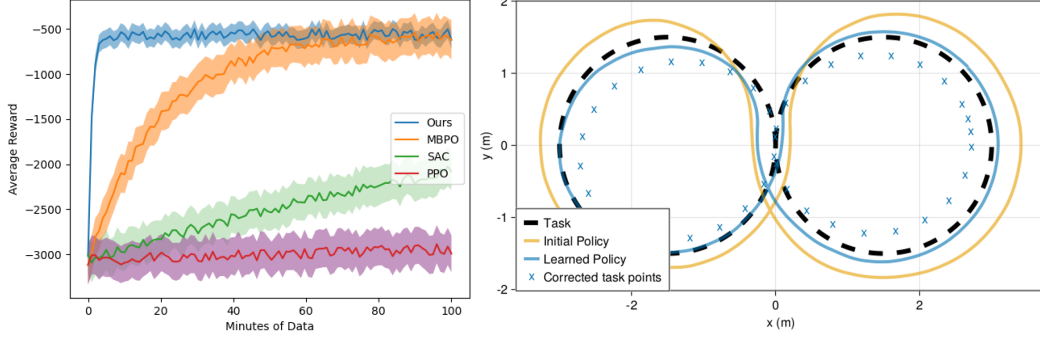

Figure 3: (Left) Training curves for different algorithms applied to a high-fidelity simulation model of an RC car. (Right) One lap of the quadruped around the figure-8 task with corrected way points from neural network.

Fig. 1, we see a clear improvement in tracking performance and in Appendix B we further investigate the outputs of the neural network.

Next, we use a high fidelity simulation environment of the car to benchmark our approach against state-of-the-art reinforcement learning algorithms in Figure 3, in each case optimizing over the feedback control architecture described above. In particular, we compare to the model-based approach MBPO [16] and the model-free approaches SAC [8] and PPO [9]. Each of these approaches learns about the dynamics of the system from scratch; thus, it is unsurprising that our approach converges more rapidly as it exploits known physics represented by the model. The use of feedback enables us to take this approach and obtain a high-performing controller, even though the model we use is highly inaccurate, overcoming model-bias.

**Go1 Quadrupedal Robot:** We also replicate the figure-8 tracking experiment on a Unitree Go1 Edu quadrupedal robot to demonstrate the effectiveness of our approach when using a *very highly simplified* model. Feedback control is hierarchical in this case, with individual joint torques controlled at the lower level, and forward velocity and turn rate specified at the upper level. We provide these commands as outputs from a backstepping-based upon the following simplified dynamical model:

$$\begin{bmatrix} x_{t+1} \\ y_{t+1} \\ \phi_{t+1} \end{bmatrix} = \begin{bmatrix} x_t + v_t \cos(\phi_t) \Delta t \\ y_t + v_t \sin(\phi_t) \Delta t \\ \phi_t + \omega_t \Delta t \end{bmatrix}, \quad (12)$$

with equivalent variable definitions as for the car in (11). Setting a nominal lap time of 37.7s, we trained the policy using 5.9 min of real-world data over 7 iterations, each 50.9s long. Even though we used a highly simplified model for the dynamics, we again see a clear improvement in performance after training (cf. Fig. 3).

## 8 Limitations

Our approach successfully learns high-performance control policies using only limited data, acquired on physical systems. This is enabled when we are able to design a stabilizing low-level feedback controller using the model. However, there are several key limitations. First, for situations such as contact rich manipulation, it may not be clear how to design a controller with the needed properties (incremental stability). In the future, we hope to overcome this by optimizing over more complex hierarchical control stacks. Second, our approach can fail if the model discrepancy is too large such that the initial model-based controller does not reduce the sensitivity of the system. Future work may address this limitations by incorporating techniques for learning stabilizing controllers (e.g., the Lyapunov methods of [26, 27]). Additionally, while our method is highly sample-efficient, it does not take advantage of many powerful techniques from the reinforcement learning literature, such as value function learning and off policy training, leaving many directions for algorithmic advances.



## References

- [1] Z. Li, X. Cheng, X. B. Peng, P. Abbeel, S. Levine, G. Berseth, and K. Sreenath. Reinforcement learning for robust parameterized locomotion control of bipedal robots. *arXiv preprint arXiv:2103.14295*, 2021.
- [2] J. Dao, K. Green, H. Duan, A. Fern, and J. Hurst. Sim-to-real learning for bipedal locomotion under unsensed dynamic loads. In *2022 International Conference on Robotics and Automation (ICRA)*, pages 10449–10455. IEEE, 2022.
- [3] J. Tan, T. Zhang, E. Coumans, A. Iscen, Y. Bai, D. Hafner, S. Bohez, and V. Vanhoucke. Sim-to-real: Learning agile locomotion for quadruped robots. *arXiv preprint arXiv:1804.10332*, 2018.
- [4] A. Nagabandi, I. Clavera, S. Liu, R. S. Fearing, P. Abbeel, S. Levine, and C. Finn. Learning to adapt in dynamic, real-world environments through meta-reinforcement learning. *arXiv preprint arXiv:1803.11347*, 2018.
- [5] A. Nagabandi, G. Kahn, R. S. Fearing, and S. Levine. Neural network dynamics for model-based deep reinforcement learning with model-free fine-tuning. In *2018 IEEE International Conference on Robotics and Automation (ICRA)*, pages 7559–7566. IEEE, 2018.
- [6] K. Chua, R. Calandra, R. McAllister, and S. Levine. Deep reinforcement learning in a handful of trials using probabilistic dynamics models, 2018.
- [7] M. Deisenroth and C. E. Rasmussen. Pilco: A model-based and data-efficient approach to policy search. In *Proceedings of the 28th International Conference on machine learning (ICML-11)*, pages 465–472. Citeseer, 2011.
- [8] T. Haarnoja, S. Ha, A. Zhou, J. Tan, G. Tucker, and S. Levine. Learning to walk via deep reinforcement learning. *arXiv preprint arXiv:1812.11103*, 2018.
- [9] J. Schulman, F. Wolski, P. Dhariwal, A. Radford, and O. Klimov. Proximal policy optimization algorithms. *CoRR*.
- [10] D. Silver, G. Lever, N. Heess, T. Degris, D. Wierstra, and M. Riedmiller. Deterministic policy gradient algorithms. In *International conference on machine learning*, pages 387–395. Pmlr, 2014.
- [11] J. Schulman, S. Levine, P. Abbeel, M. Jordan, and P. Moritz. Trust region policy optimization. In *International conference on machine learning*, pages 1889–1897, 2015.
- [12] T. P. Lillicrap, J. J. Hunt, A. Pritzel, N. Heess, T. Erez, Y. Tassa, D. Silver, and D. Wierstra. Continuous control with deep reinforcement learning. *arXiv preprint arXiv:1509.02971*, 2015.
- [13] P. Abbeel, M. Quigley, and A. Y. Ng. Using inaccurate models in reinforcement learning. In *Proceedings of the 23rd international conference on Machine learning*, pages 1–8, 2006.
- [14] N. Heess, G. Wayne, D. Silver, T. Lillicrap, T. Erez, and Y. Tassa. Learning continuous control policies by stochastic value gradients. *Advances in neural information processing systems*, 28, 2015.
- [15] N. Amann, D. H. Owens, and E. Rogers. Iterative learning control using optimal feedback and feedforward actions. *International Journal of Control*, 65(2):277–293, 1996.
- [16] M. Janner, J. Fu, M. Zhang, and S. Levine. When to trust your model: Model-based policy optimization. *Advances in neural information processing systems*, 32, 2019.
- [17] R. S. Sutton. Integrated modeling and control based on reinforcement learning and dynamic programming. *Advances in neural information processing systems*, 3, 1990.

- 326 [18] J. Buckman, D. Hafner, G. Tucker, E. Brevdo, and H. Lee. Sample-efficient reinforcement  
327 learning with stochastic ensemble value expansion. *Advances in neural information processing*  
328 *systems*, 31, 2018.
- 329 [19] S. Gu, T. Lillicrap, I. Sutskever, and S. Levine. Continuous deep q-learning with model-based  
330 acceleration. In *International conference on machine learning*, pages 2829–2838. PMLR,  
331 2016.
- 332 [20] S. Sastry. *Nonlinear systems: analysis, stability, and control*, volume 10. Springer Science &  
333 Business Media, 1999.
- 334 [21] D. P. Bertsekas and J. N. Tsitsiklis. Gradient convergence in gradient methods with errors.  
335 *SIAM Journal on Optimization*, 10(3):627–642, 2000.
- 336 [22] I. R. Manchester and J.-J. E. Slotine. Control contraction metrics: Convex and intrinsic criteria  
337 for nonlinear feedback design. *IEEE Transactions on Automatic Control*, 62(6):3046–3053,  
338 2017.
- 339 [23] J. Bezanson, A. Edelman, S. Karpinski, and V. B. Shah. Julia: A fresh approach to numerical  
340 computing. *SIAM review*, 59(1):65–98, 2017.
- 341 [24] M. Quigley, K. Conley, B. P. Gerkey, J. Faust, T. Foote, J. Leibs, R. Wheeler, and A. Y. Ng.  
342 Ros: an open-source robot operating system. In *ICRA Workshop on Open Source Software*,  
343 2009.
- 344 [25] K. M. Lynch and F. C. Park. *Modern robotics*. Cambridge University Press, 2017.
- 345 [26] J. Z. Kolter and G. Manek. Learning stable deep dynamics models. *Advances in neural infor-*  
346 *mation processing systems*, 32, 2019.
- 347 [27] H. Ravanbakhsh and S. Sankaranarayanan. Learning control lyapunov functions from coun-  
348 terexamples and demonstrations. *Autonomous Robots*, 43:275–307, 2019.

## A Missing Proofs

This appendix contains proofs of claims that were omitted in the main document and several supportive Lemmas. Section A.1 provides the derivation for Proposition 1, Section A.2 states and formally derives the reverse-time representation of the gradient, while Section A.3 builds on this calculation to derive the desired representation for the hessian. Finally, Section A.5 contains the auxiliary Lemmas.

### A.1 Proof of Proposition 1

The expression for  $\nabla J_T(x_0; \theta)$  follows directly from the chain rule. To obtain the expression for  $\frac{\partial x_t}{\partial \theta}$  we differentiate the dynamics  $x_{t+1} = F(x_t, u_t)$  to yield:

$$\begin{aligned} \frac{\partial x_{t+1}}{\partial \theta} &= \frac{\partial}{\partial x} F(x_t, u_t) \cdot \frac{\partial x_t}{\partial \theta} + \frac{\partial}{\partial u} F(x_t, u_t) \cdot \frac{\partial u_t}{\partial \theta} \\ &= A_t^{cl} \frac{\partial x_t}{\partial \theta} + B_t \frac{\partial \pi_t^\theta}{\partial \theta}, \end{aligned}$$

where the second equality is obtained by noting that:

$$\frac{\partial u_t}{\partial \theta} = \frac{\partial \pi_t^\theta}{\partial \theta} + \frac{\partial \pi_t^\theta}{\partial x} \cdot \frac{\partial x_t}{\partial \theta} = \frac{\partial \pi_t^\theta}{\partial \theta} + K_t \cdot \frac{\partial x_t}{\partial \theta}.$$

The desired expression is then obtained by unrolling the recursion and noting that  $\frac{\partial x_t}{\partial \theta} = 0$ .

### A.2 Efficient Backwards Pass for Policy Gradient Computation

While the form for the policy gradient (5) and our model-based approximation in (7) will prove convenient for analysis, computing the many approximate sensitivity terms  $\frac{\partial x_t}{\partial \theta}$ —and in particular the  $\Phi_{t,t'}$  terms—is highly complex and requires many forwards passes along the trajectory. In practice, we can more efficiently compute the approximate gradient as follows:

$$\nabla J_T(\theta; x_0) = \sum_{t=0}^{T-1} (p_{t+1} B_t + \nabla R_t(x_t)) \cdot \frac{\partial \pi_t^\theta}{\partial \theta}, \text{ where} \quad (13)$$

$$p_t = p_{t+1}(\hat{A}_t + \hat{B}_t K_t) + \nabla R_t(x_t) \quad \text{and} \quad p_T = \nabla R_T(x_T). \quad (14)$$

Here, the recursion with the variables  $p_t \in \mathbb{R}^{1 \times n}$  performs ‘back propagation through time’ along the real-world trajectory using the derivatives of the model.

*Proof.* As before, let  $\{x_t\}_{t=0}^T$  and  $\{u_t\}_{t=0}^{T-1}$  denote the state trajectory that results from applying the policy  $\pi_\theta$  from  $x_0$ .

Permitting a slight abuse of notation, we can re-write the cost by moving the dynamics constraints into the cost and weighting them with Lagrange multipliers:

$$J(\theta; x_0) = \sum_{i=0}^{T-1} R_i(x_i) + p_{t+1}^T (x_{t+1} - F(x_t, \pi_\theta^t(x_t))) \quad (15)$$

Define the Hamiltonian

$$H_t(x_t, p_{t+1}, \theta) = p_{t+1}^T F(x_t, \pi_\theta^t(x_t)) + R_t(x_t), \quad (16)$$

and note that we may then re-write the cost as:

$$J(\theta; x_0) = R_T(x_T) \langle p_T, x_T \rangle + \langle p_0, x_0 \rangle + \sum_{t=0}^{T-1} p_t^T x_t - H_t(x_t, p_{t+1}, \theta) \quad (17)$$

To reduce clutter below we will frequently omit the arguments from  $H_t$ , since it is clear that the map is evaluated at  $(x_t, p_{t+1}, \theta)$ . Let  $\delta \theta \in \mathbb{R}^p$  be a variation on the policy parameters and let

376  $\delta x_t = \frac{\partial \phi_\theta^t}{\partial \theta} \delta \theta$  denote the corresponding first variation of the state. To first order, the change in the  
 377 cost corresponding to these variations is:

$$\delta J|_\theta(\delta \theta) = \langle \nabla Q_T(x_T) + p_T, \delta x_T \rangle + \sum_{t=0}^{T-1} \langle p_t - \nabla_x H_t, \delta x_t \rangle - \langle \nabla_\theta H_t, \delta \theta \rangle. \quad (18)$$

378 To simplify the expression, let us make the following choices for the multipliers:

$$p_T = \nabla R_T(x_T) \quad (19)$$

379

$$p_t^T = \nabla_x H_t(x_t, p_{t+1}, \theta) \quad (20)$$

$$= p_{t+1}^T \frac{\partial}{\partial x} F(x, \pi_\theta^t(x)) + \nabla R_t(x_t) \quad (21)$$

$$= p_{t+1}^T \frac{\partial}{\partial x} A_t + \nabla R_t(x_t) \quad (22)$$

380 where we have applied the short-hand from developed in Section 3 for the particular task. Plugging  
 381 this choice for the multipliers into (18) causes the  $\delta x_t$  terms to vanish and yields:

$$\delta J|_\theta(\delta \theta) = \sum_{t=0}^{t-1} \langle \nabla_\theta H_t, \delta \theta \rangle \quad (23)$$

$$= \langle p_{t+1}^T \frac{\partial}{\partial u} F(x, \pi_\theta^t) \frac{\partial \pi_\theta^t}{\partial \theta} + \nabla R_t(\pi_\theta^T) \frac{\partial \pi_\theta^t}{\partial \theta}, \delta \theta \rangle \quad (24)$$

$$= \sum_{t=0}^{t-1} \langle p_{t+1}^T B_t + r_t, \frac{\partial \pi_\theta^t}{\partial \theta} \delta \theta \rangle \quad (25)$$

382 Since this calculation holds for arbitrary  $\delta \theta$  this demonstrates that the gradient of the objective is  
 383 given by:

$$\nabla_\theta J(\theta, x_0) = \sum_{t=0}^{t-1} \langle p_{t+1}^T B_t + r_t, \frac{\partial \pi_\theta^t}{\partial \theta} \rangle. \quad (26)$$

384

□

### 385 A.3 Calculating the Hessian

386 To calculate the Hessian of the objective we continue the Lagrange multiplier approach discussed  
 387 above. Now let  $\delta^2 x_t$  denote the second order variation in the state with respect to the perturbation  
 388  $\delta \theta$ . By collecting second order terms in (17) the attendant second-order variation to the cost is  
 389 given by:

$$\delta^2 J|_\theta(\delta \theta) = \langle \delta x_t^T \nabla^2 R_T(x_T), \delta x_t \rangle + \langle \nabla R_T(x_T) + p_T, \delta^2 x_T \rangle \quad (27)$$

$$+ \sum_{t=0}^{T-1} \left( \langle p_t - \nabla_x H_t, \delta^2 x_t \rangle + \langle \delta x_t^T \nabla_{xx} H_t(x_t), \delta x_t \rangle \right. \\ \left. + 2 \langle \delta x_t \nabla_{x\theta} H_t, \delta \theta \rangle + \langle \delta \theta^T \nabla_{\theta\theta} H_t, \delta \theta \rangle \right) \quad (28)$$

390 By using the choice of costate introduced above, this time the second order state variations  $\delta^2 x_t$   
 391 vanish from this expression so that we arrive at:

$$\delta^2 J|_\theta(\delta \theta) = \langle \delta x_t^T \nabla^2 Q_T(x_T), \delta x_t \rangle \quad (29)$$

$$+ \sum_{t=0}^{T-1} \langle \delta x_t^T \nabla_{xx} H_t(x_t), \delta x_t \rangle + 2 \langle \delta x_t \nabla_{x\theta} H_t, \delta \theta \rangle + \langle \delta \theta^T \nabla_{\theta\theta} H_t, \delta \theta \rangle,$$

392 where we recall that we have

$$\delta x_t = \frac{\partial \phi_\theta^t}{\partial \theta} := \sum_{t'=0}^{t-1} \phi_{t,t'} B_{t'} \frac{\partial \pi_\theta^{t'}}{\partial \theta}. \quad (30)$$

#### 393 A.4 Restatement of Main Result and Proof

394 **Theorem 2.** Assume that the first and second partial derivatives of  $R_t$ ,  $\pi_t^\theta$ ,  $F$  and  $\hat{F}$  are bounded.  
 395 Further assume that there exists a constant  $\Delta > 0$  such that for each  $x_0 \in \mathcal{X}$  and  $u \in \mathcal{U}$  the error  
 396 in the model derivatives are bounded by  $\max\{\|\frac{\partial}{\partial x} F(x, u)\|, \|\frac{\partial}{\partial u} F(x, u)\|\} < \Delta$ . Finally, assume  
 397 that the policy class  $\phi_t^\theta$  has been designed such that exists constants  $M, \alpha > 0$  such that for each  
 398  $x_0 \in \mathcal{X}$ ,  $\theta \in \Theta$ , and  $t > t'$  we have:  $\max\{\|\Phi_{t,t'}\|, \|\hat{\Phi}_{t,t'}\|\} < M\alpha^{t-t'}$ . Then we may bound the  
 399 bias and variance of our policy gradient estimator as follows:

$$\|\nabla \mathcal{J}_T(\theta) - \bar{g}_T(\theta)\| \leq \begin{cases} CT^2 \alpha^T \Delta & \text{if } \alpha > 1 \\ CT^2 \Delta & \text{if } \alpha = 1 \\ CT \Delta & \text{if } \alpha < 1, \end{cases} \quad \mathbb{E} \left[ \|\hat{g}_T^N(\theta) - \bar{g}_T(\theta)\|^2 \right] \leq \begin{cases} \frac{WT^4 \alpha^{2T}}{N} & \text{if } \alpha > 1 \\ \frac{WT^4}{N} & \text{if } \alpha = 1 \\ \frac{WT^2}{N} & \text{if } \alpha < 1. \end{cases}$$

400 Moreover, the conditioning of the underlying policy optimization problem is characterized via:

$$\|\nabla^2 \mathcal{J}_T(\theta)\|_2 \leq \begin{cases} KT^4 \alpha^{3T} & \text{if } \alpha > 1 \\ KT^4 & \text{if } \alpha = 1 \\ KT & \text{if } \alpha < 1. \end{cases}$$

401 We first bound the bias of the gradient:

$$\begin{aligned} \|\nabla \mathcal{J}_T(\theta) - \bar{g}_T(\theta)\| &= \|\mathbb{E}[\nabla J_T(\theta; x_0) - \hat{g}_T(\theta; x_0)]\| \\ &\leq \mathbb{E}[\|\nabla J_T(\theta; x_0) - \hat{g}_T(\theta; x_0)\|] \\ &\leq \sup \|\nabla J_T(\theta; x_0) - \hat{g}_T(\theta; x_0)\|, \end{aligned}$$

402 where the preceding expectations are over  $x_0 \sim D$ . The desired bound on the bias directly follows  
 403 by applying the bound on gradient errors from Lemma 2 below.

404 Next, to bound the variance estimate note that:

$$\begin{aligned} \mathbb{E}[\|\hat{g}_T^N(\theta) - \bar{g}_T(\theta)\|^2] &= \frac{1}{N^2} \sum_{i=1}^N \mathbb{E}[\|\hat{g}_T(\theta; x_0) - \bar{g}_T(\theta)\|^2] \\ &\leq \frac{1}{N} \sup \|\hat{g}_T(\theta; x_0) - \bar{g}_T(\theta)\|^2 \\ &\leq \frac{4}{N} \sup \|\hat{g}_T(\theta; x_0)\|^2, \end{aligned}$$

405 where the first expectation is over  $(x_0^i)_{i=1}^N \sim \mathcal{D}^N$ , the second is with respect  $(x_0) \sim \mathcal{D}$ . The desired  
 406 bound on the variance follows via a direct application of Lemma ?? in the Appendix which provides  
 407 a uniform upper-bound on the gradient estimates.

408 imilar to before we have:

$$\begin{aligned} \|\nabla^2 \mathcal{J}_T(\theta)\| &\leq \mathbb{E}_{(x_0) \sim \mathcal{D}} [\|\nabla^2 J_T(\theta; x_0)\|] \\ &\leq \sup_{(x_0) \in D} \|\nabla^2 J_T(\theta; x_0)\|. \end{aligned}$$

409 The desired bound follows from Lemma 3 in the Appendix, which uniformly bounds the task-  
 410 specific Hessians.

#### 411 A.5 Supportive Lemmas

412 **Lemma 1.** Let the Assumptions of Theorem 2 hold. Then there exists  $\beta > 0$  independent of the  
 413 parameters  $T \in \mathbb{N}$ ,  $M$  and  $\alpha \in \mathbb{R}$  such that for each  $x_0 \in D$  and  $\theta \in \Theta$  we have:

$$\|\nabla_\theta J_T(\theta; x_0)\| \leq \begin{cases} \beta T^2 \alpha^T & \text{if } \alpha > 1 \\ \beta T^2 & \text{if } \alpha = 1 \\ \beta T & \text{if } \alpha < 1. \end{cases}$$

414 *Proof.* Let the constant  $L > 0$  be large enough so that it upper-bounds the norm of the first and  
 415 second partial derivatives of  $R_t, \pi_t^\theta, F$  and  $\hat{F}$ . Fix a specific task  $x_0$  and set of policy parameters  $\theta$   
 416 and let  $A_t, B_t, K_t$  be defined along the corresponding trajectory as usual.

417 Recall from Section 3 that

$$\nabla J_T(\theta; x_0) = \sum_{t=0}^{T-1} (p_{t+1} B_t + \nabla R(x_t)) \cdot \frac{\partial \pi_t^\theta}{\partial \theta},$$

418 where the *co-state*  $p_t \in \mathbb{R}^{1 \times n}$  is given by:

$$p_t = \sum_{s=t+1}^{T-1} \nabla R(x_s) \cdot \Phi_{s,t},$$

419 by inspection. Thus, we may upper-bound the growth of the co-state as follows:

$$\|p_t\| \leq LM\alpha^{T-t} + \sum_{s=t+1}^{T-1} (L + L^2)M\alpha^{s-t} \quad (31)$$

420 By carrying out the summation, we observe that there exists  $C_1 > 0$  sufficiently large such that

$$\|p_t\| \leq \begin{cases} C_1 T \alpha^T & \text{if } \alpha > 1 \\ C_1 T & \text{if } \alpha = 1 \\ C_1 & \text{if } \alpha < 1, \end{cases} \quad (32)$$

421 where we have used the fact that  $\sum_{s=t+1}^{T-1} M\alpha^{s-t} < M\frac{1}{1-\alpha}$  for the third case. We can bound the  
422 overall gradient as follows:

$$\|\nabla J_T(\theta; x_0)\| = \sum_{t=0}^{T-1} L(L\|p_{t+1}\| + L), \quad (33)$$

423 which when combined with the bound on the costate above demonstrates the desired result for some  
424 constant  $\beta > 0$  sufficiently large to cover all choices of  $x_0$ .  $\square$

425 **Lemma 2.** *Let the Assumptions of Theorem 2 hold. Then there exists  $C > 0$  independent of  $T \in \mathbb{N}$ ,  
426  $M, \Delta_A, \Delta_B > 0$  and  $\alpha \in \mathbb{R}$  such that for each  $x_0 \in D$  and  $\theta \in \Theta$  we have:*

$$\|\nabla_\theta J_T(\theta; x_0) - \hat{g}_T(\theta; x_0)\| \leq \begin{cases} CT^3 \alpha^T \Delta & \text{if } \alpha > 1 \\ CT^3 \Delta & \text{if } \alpha = 1 \\ CT^2 \Delta & \text{if } \alpha < 1, \end{cases}$$

427 where  $\Delta = \min\{\Delta_A, \Delta_B\}$ .

428 *Proof.* Let the constant  $L > 0$  be large enough so that it upper-bounds the norm of the first and  
429 second partial derivatives of  $R_t, \pi_t^\theta, F$  and  $\hat{F}$ . Fix a specific task  $x_0$  and set of policy parameters  $\theta$   
430 and let  $A_t, B_t, K_t$  as usual.

431 Using equations (7), (??) and (10) we obtain:

$$\begin{aligned} \|\nabla J_T(\theta; x_0) - \hat{g}_T(\theta, x_0)\| &= \left\| \sum_{t=1}^T \nabla R(x_t) \cdot \sum_{t'=0}^t (\Phi_{t,t'} B_{t'} - \hat{\Phi}_{t,t'} \hat{B}_{t'}) \right\| \\ &\leq \sum_{t=1}^T \|\nabla R(x_t)\| \cdot \sum_{t'=0}^t \|\Phi_{t,t'} \Delta B_{t'} + \left( \sum_{s=t'+1}^{t-1} \Phi_{t,s} \Delta A_s^{cl} \hat{\Phi}_{s-1,t'} \right) \hat{B}_{t'}\| \\ &\leq \sum_{t=1}^T L \sum_{t'=0}^t (M\alpha^{t-t'} \Delta + \left( \sum_{s=t'+1}^{t-1} M\alpha^{t-s} \Delta M\alpha^{s-t'} \right) L). \end{aligned}$$

Note that the preceding analysis holds for any choice of  $\theta$  and  $x_0$ . Thus, noting that

$$\sum_{s=t'+1}^{t-1} M\alpha^{t-s} \Delta M\alpha^{s-t'} < M^2 \frac{1}{1-\alpha} \Delta$$



432 in the case where  $\alpha < 1$ , leveraging the preceding inequality we can easily conclude that there exists  
 433  $C > 0$  sufficiently large such that for each  $\theta$  and  $x_0$  we have:

$$\|\nabla_{\theta} J_T(\theta; x_0) - \hat{g}_T(\theta; x_0)\| \leq \begin{cases} CT^3 \alpha^T \Delta & \text{if } \alpha > 1 \\ CT^3 \Delta & \text{if } \alpha = 1 \\ CT^2 \Delta & \text{if } \alpha < 1, \end{cases}$$

434 which demonstrates the desired result.  $\square$

435 **Lemma 3.** *Let the Assumptions of Theorem 2 hold. Then there exists  $K > 0$  independent of  $T \in \mathbb{N}$ ,  
 436  $M$  and  $\alpha \in \mathbb{R}$  such that for each  $x_0 \in D$  and  $\theta \in \Theta$  we have:*

$$\|\nabla_{\theta}^2 J_T(\theta; x_0)\| \leq \begin{cases} KT^4 \alpha^{3T} & \text{if } \alpha > 1 \\ KT^4 & \text{if } \alpha = 0 \\ KT & \text{if } \alpha < 1. \end{cases}$$

437 *Proof.* Let the constant  $L > 0$  be large enough so that it upper-bounds the norm of the first and  
 438 second partial derivatives of  $R_t$ ,  $\pi_t^{\theta}$ ,  $F$  and  $\hat{F}$ . Fix a specific  $x_0$  and set of policy parameters  $\theta$ .  
 439 Recall from that the Hessian can be calculated as follows:

$$\begin{aligned} \nabla^2 J_T(\theta; x_0) &= \left(\frac{\partial x_T}{\partial \theta}\right)^T \cdot \nabla^2 R_T(x_T) \cdot \frac{\partial x_T}{\partial \theta} \\ &\quad + \sum_{t=0}^{T-1} \left(\frac{\partial x_t}{\partial \theta}\right)^T \cdot \frac{\partial^2}{\partial x^2} H_t(x_t, p_t, \theta) \cdot \frac{\partial x_t}{\partial \theta} \\ &\quad + 2 \sum_{t=0}^{T-1} \left(\frac{\partial x_t}{\partial \theta}\right)^T \cdot \frac{\partial^2}{\partial x \partial \theta} H_t(x_t, p_{t+1}, \theta) \\ &\quad + \sum_{t=0}^{T-1} \frac{\partial^2}{\partial \theta^2} H_t(x_t, p_{t+1}, \theta). \end{aligned}$$

440 Using the assumptions of the theorem, we observe that there exists a constant  $C_1 > 0$  sufficiently  
 441 large such that

$$\max\left\{\frac{\partial^2}{\partial x^2} H_t(x_t, p_t, \theta), \frac{\partial^2}{\partial x \partial \theta} H_t(x_t, p_{t+1}, \theta), \frac{\partial^2}{\partial x \partial \theta} H_t(x_t, p_{t+1}, \theta)\right\} \leq C_1(\|p_{t+1}\| + 1) \quad (34)$$

442 and

$$\|\nabla^2 J_T(\theta; x_0)\| = L \left\| \frac{\partial x_T}{\partial \theta} \right\|^2 + \sum_{t=0}^{T-1} C_1(\|p_{t+1}\| + 1) \left[ \left\| \frac{\partial x_T}{\partial \theta} \right\|^2 + \left\| \frac{\partial x_t}{\partial \theta} \right\| + 1 \right] \quad (35)$$

443 holds for all choices of  $x_0$  and  $\theta$ .

444 Using our preceding analysis, we can bound the derivative as the state trajectory as follows:

$$\begin{aligned} \left\| \frac{\partial x_t}{\partial \theta} \right\| &= \left\| \sum_{t'=0}^{t-1} \Phi_{t,t'} B_{t'} \frac{\partial \pi_{t'}^{\theta}}{\partial \theta} \right\| \\ &\leq \sum_{t'=0}^{t-1} L^2 M \alpha^{t-t'} \end{aligned}$$

445 This demonstrates that there exists  $C_2 > 0$  sufficiently large such that:

$$\left\| \frac{\partial x_t}{\partial \theta} \right\| \leq \begin{cases} C_2 T \alpha^T & \text{if } \alpha > 1 \\ C_2 T & \text{if } \alpha = 1 \\ C_2 & \text{if } \alpha < 1, \end{cases} \quad (36)$$

446 where in the case where  $\alpha < 1$  we have used the fact that  $\sum_{t'=0}^{t-1} M \alpha^{t-t'} < M \frac{1}{1-\alpha}$ . Combining the  
 447 previous bounds (34), (32) and (35) then demonstrates the desired result.  $\square$

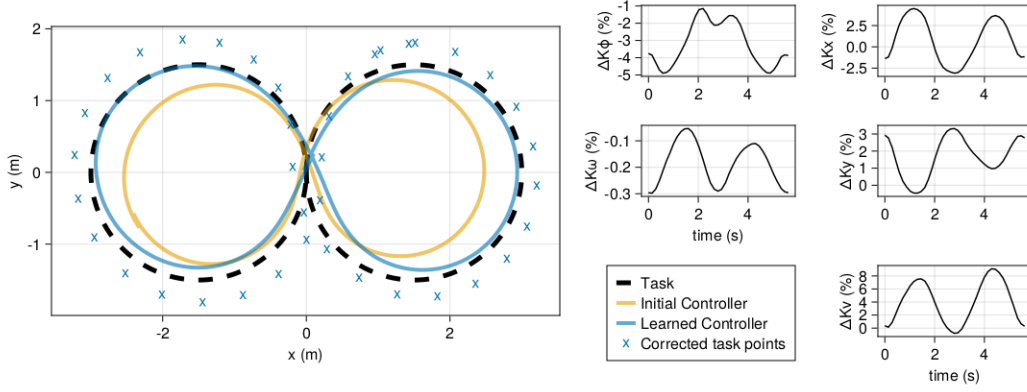

Figure 4: One lap of the car around the figure-8 task before/after training and neural network outputs.

## 448 B NVIDIA JetRacer Additional Experiment Details

449 We now examine the neural the neural network outputs during a single execution of the figure-eight  
 450 task for the car experiment, depicted in Fig. 4. We see that the neural network issues corrections on  
 451 the outside of the track, which is reasonable considering the untrained car was tracking the inside  
 452 of the track. We note the following controller gains adjustments from the neural network: (i) an  
 453 overall negative value selected for the feedforward steering gain  $\Delta K_\omega$  counteracts the car's inherent  
 454 steering bias in the positive steering direction; (ii) lower values of forward velocity gain  $\Delta K_v$  were  
 455 selected when crossing the origin, allowing the car to more closely track at this critical point; and  
 456 (iii) elevated values of  $\Delta K_v$  are selected to speed up the car for the rest of the track, increasing  
 457 reward.
